# Supplementary material for: The Skin Microbiome of Cohabiting Couples
Source: PubMed Central journal article supplement (PMC5527301; doi:10.1128/msystems.00043-17), 2017-07-20

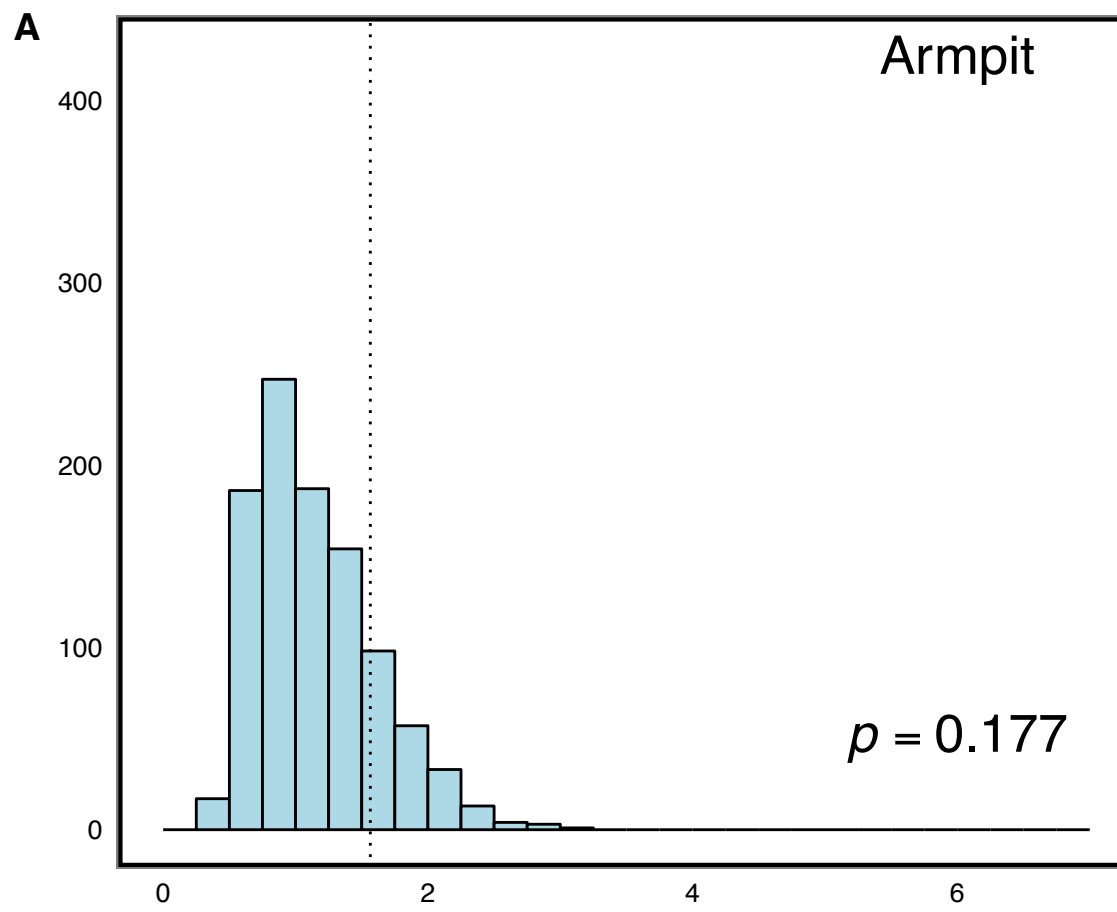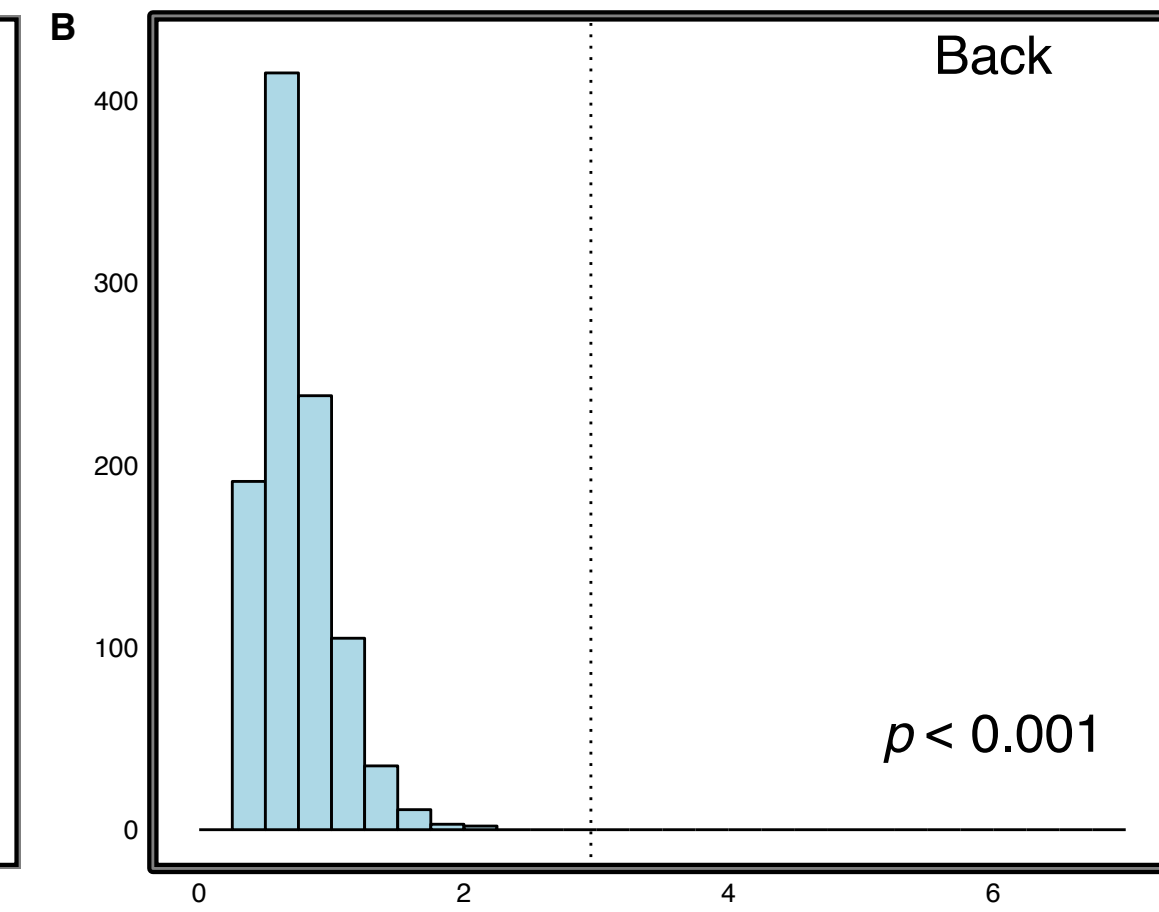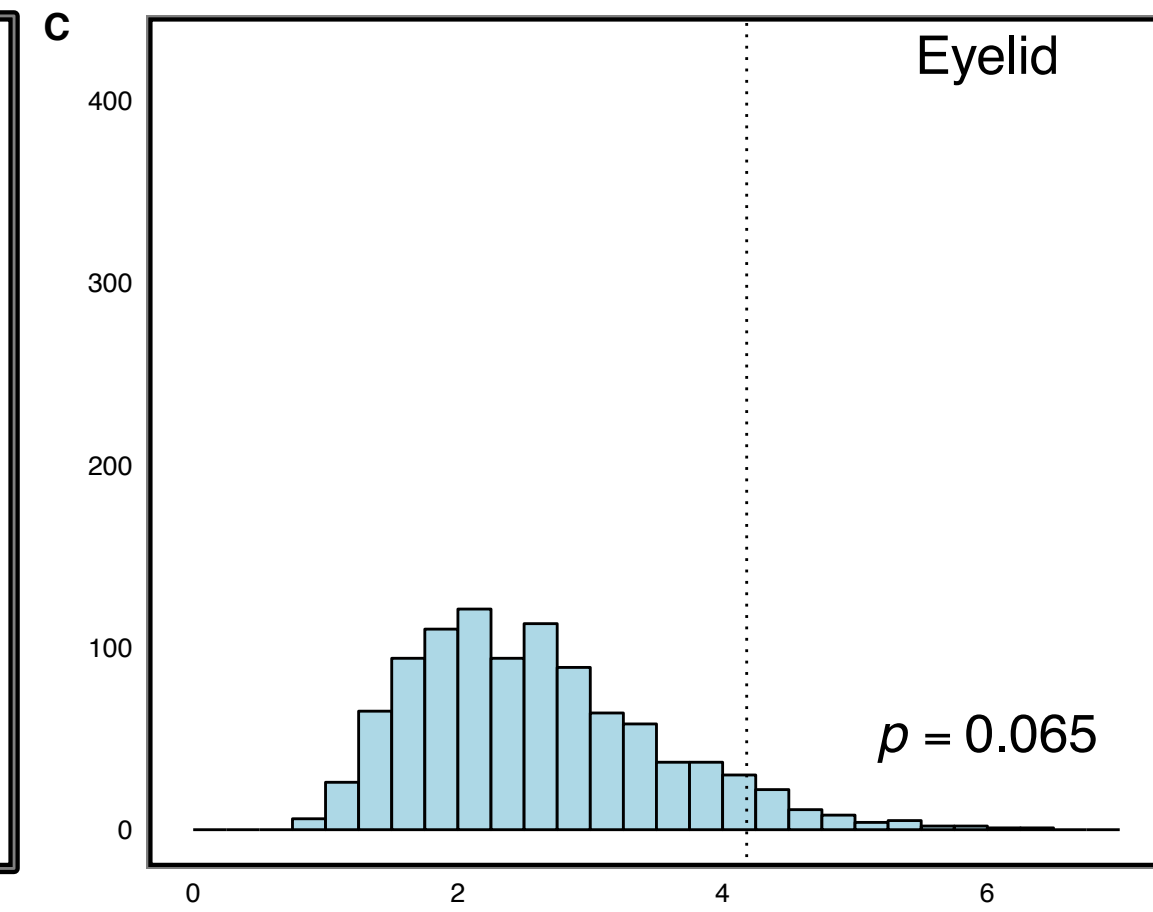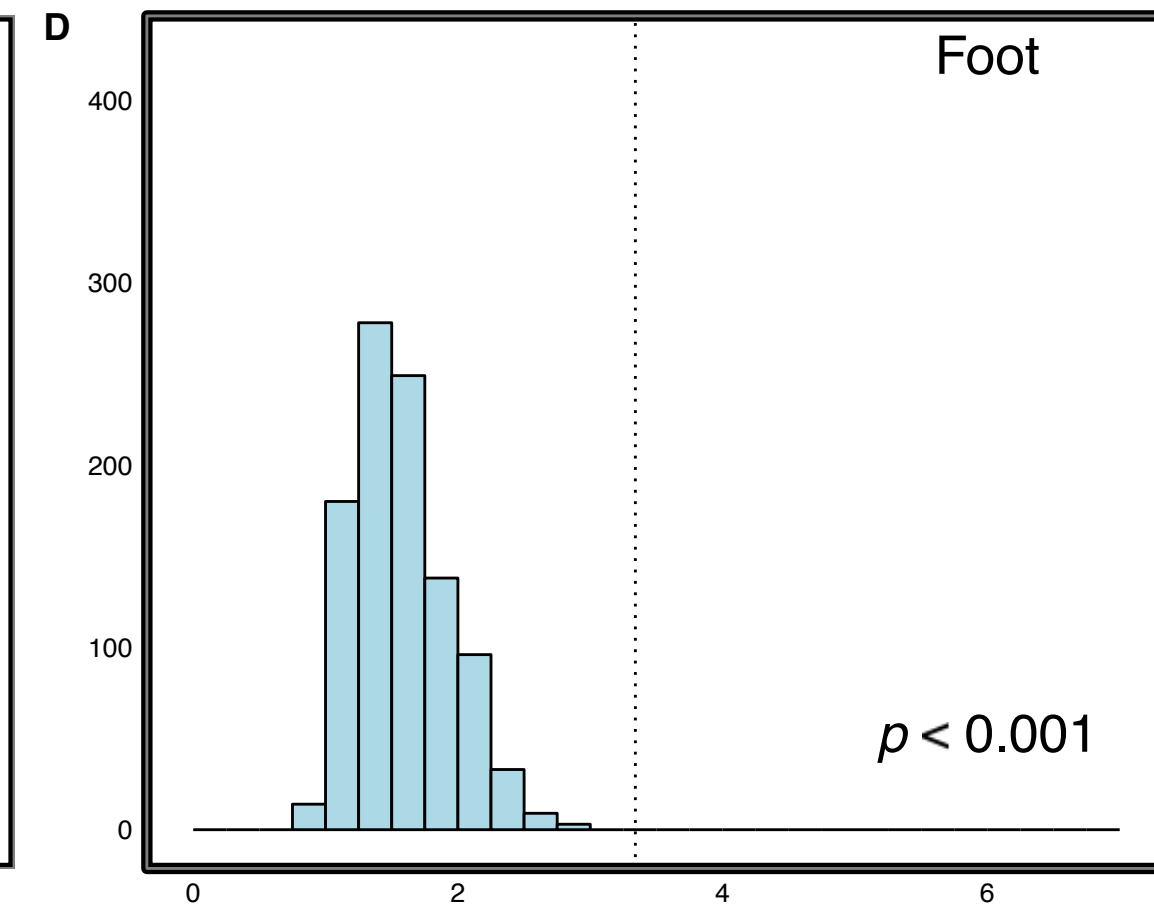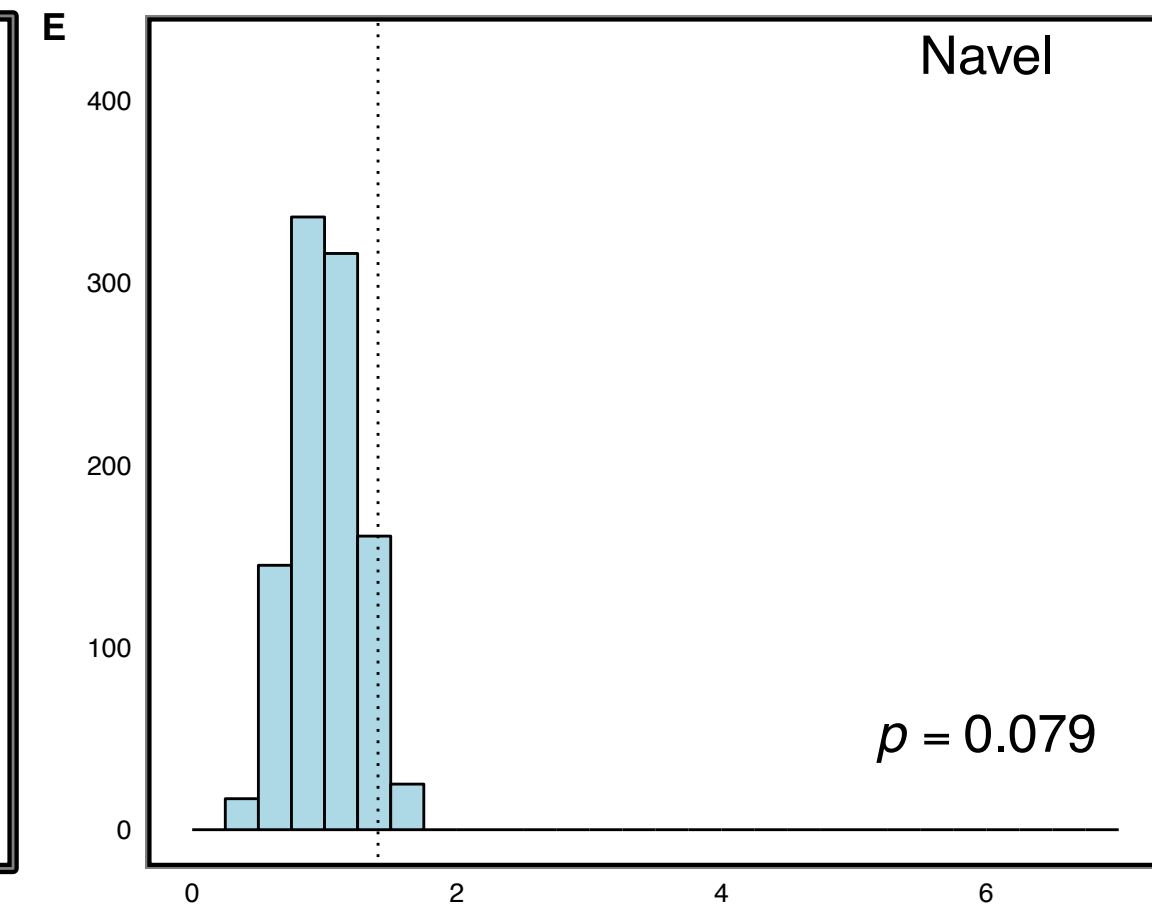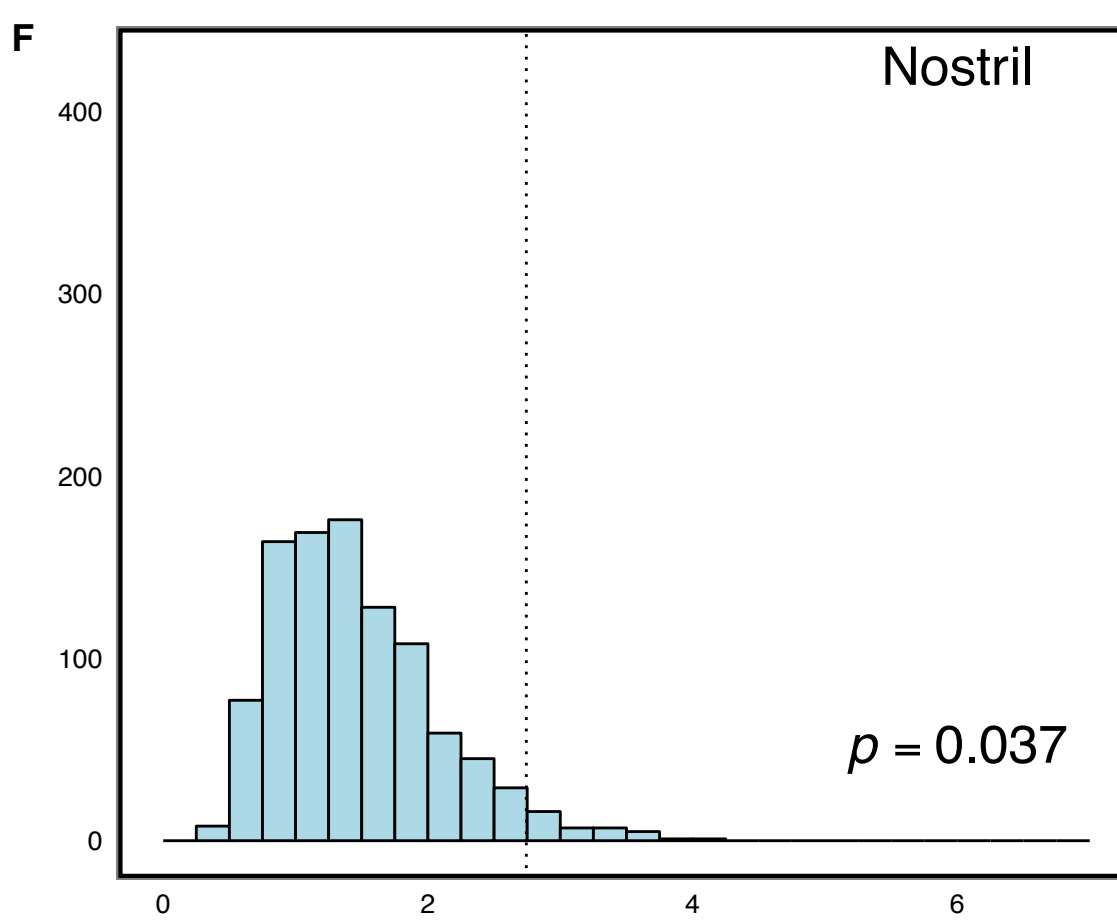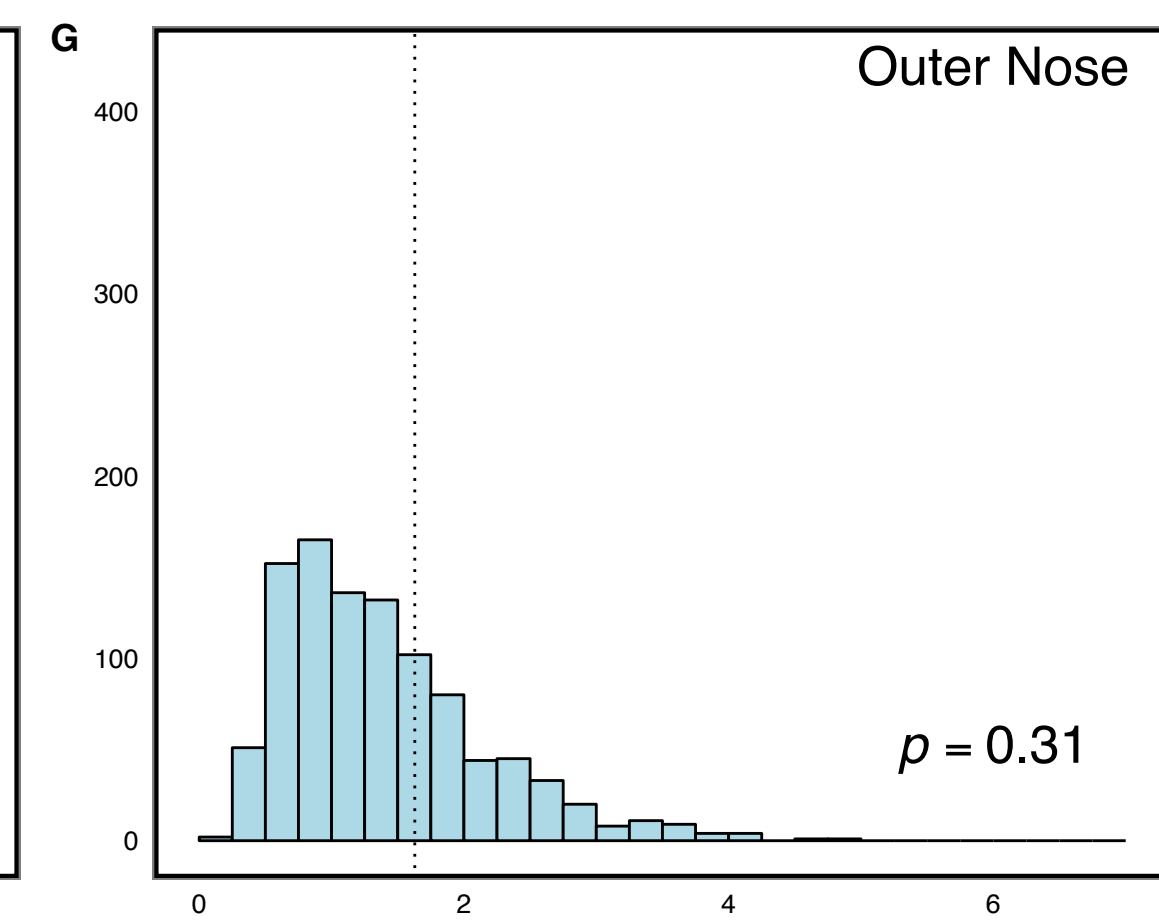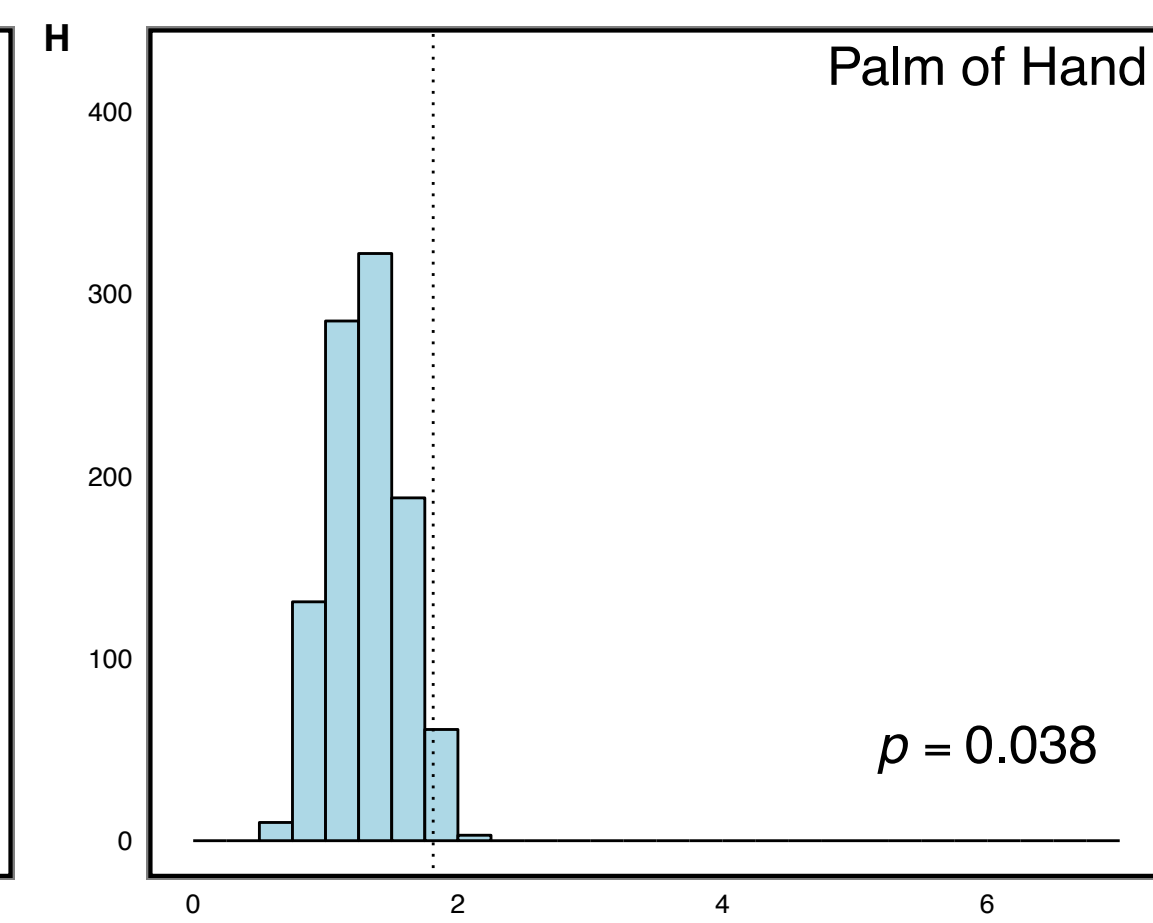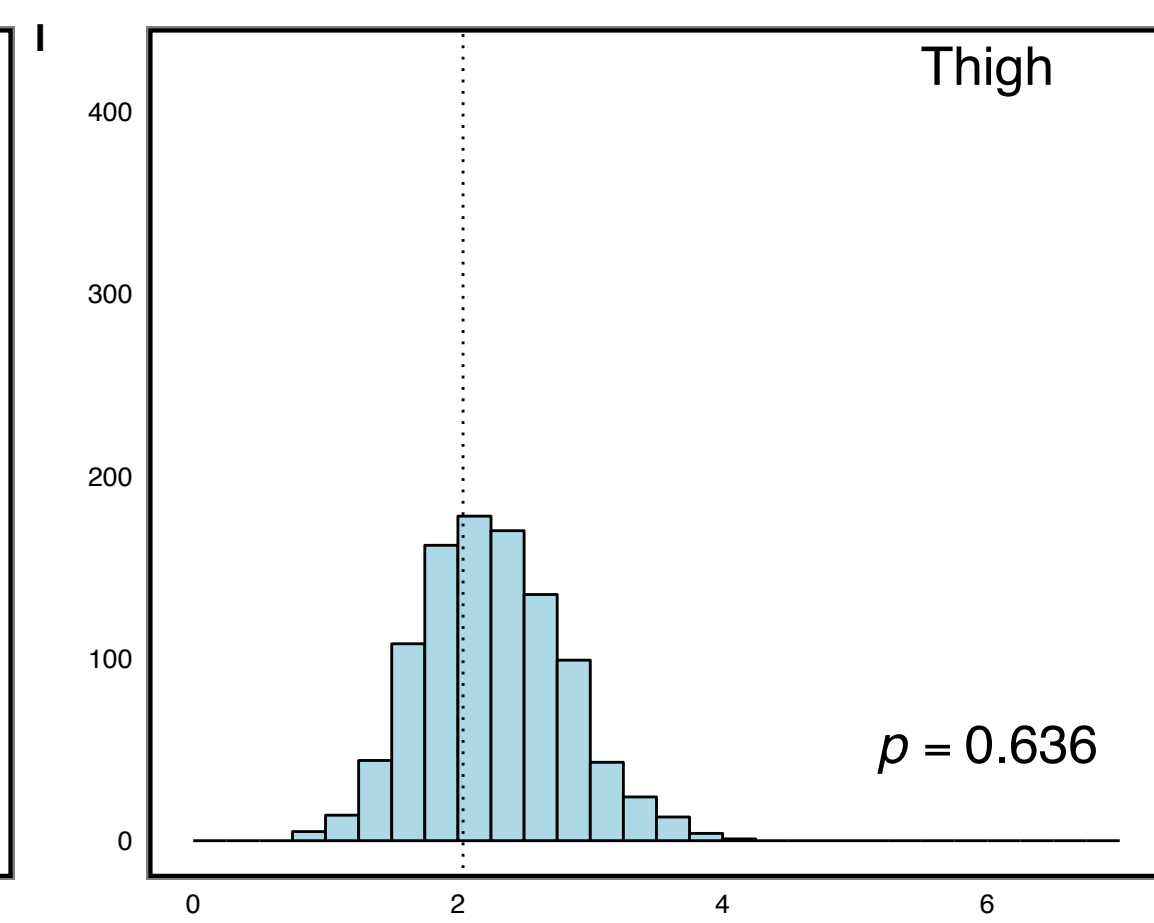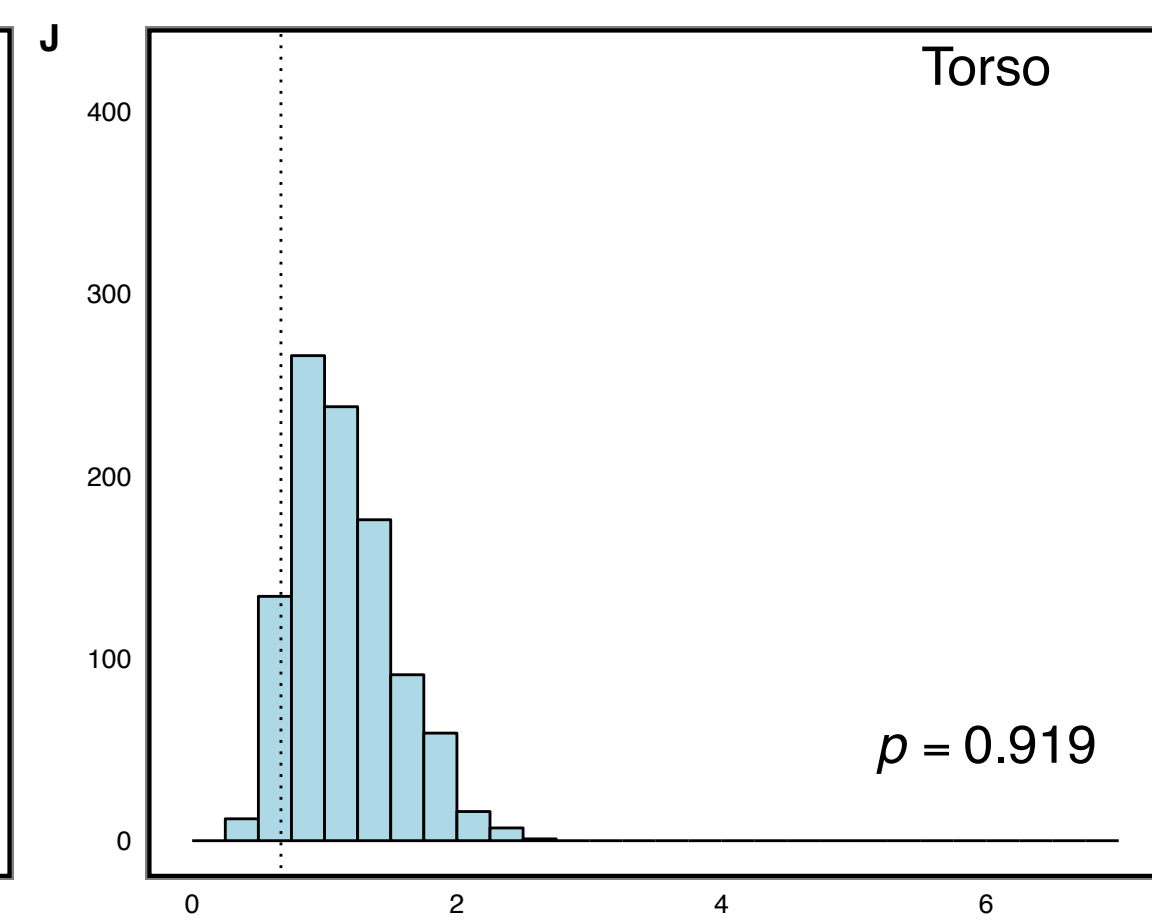

Supplement: sys004172121sf4.pdf [file sys004172121sf4.pdf]
